# Supplementary material for: A Retrospective Assessment of Occupational Exposure to Elemental Carbon in the U.S. Trucking Industry
Source: PubMed Central journal article supplement (PMC3222985; doi:10.1289/ehp.1002981), 2011-03-29
Supplement: ehp.1002981.s001.pdf [file ehp.1002981.s001.pdf]

## Supplemental Material

### A Retrospective Assessment of Occupational Exposure to Elemental Carbon in the US Trucking Industry

Davis ME, Hart JE, Laden F, Garshick E and TJ Smith

| <b>Table of Contents</b>                                   | <b><u>Page</u></b> |
|------------------------------------------------------------|--------------------|
| Sampling Locations                                         | S-2                |
| Figure 1: Map of TriPS Trucking Terminals                  |                    |
| TriPS Job Descriptions                                     | S-2                |
| Table 1: Job Descriptions in the Trucking Industry Cohort  |                    |
| Choice of EC as Diesel Exhaust Exposure Marker             | S-3                |
| Structure of Baseline Exposure Model                       | S-4                |
| Figure 2: EC SEM Pathway Diagram and Results               |                    |
| Table 2: Variables in SEM Exposure Model                   |                    |
| Window Status Description                                  | S-5                |
| Diesel Fuel Timeline                                       | S-5                |
| Table 3: History of Diesel Use in the Four TriPS Companies |                    |
| Selection of EC Background Trend                           | S-6                |
| Figure 3: Comparison of Background Trends 1985-2000        |                    |
| References                                                 | S-7                |

## Sampling Locations

Figure 1: Map of TriPS Trucking Terminals

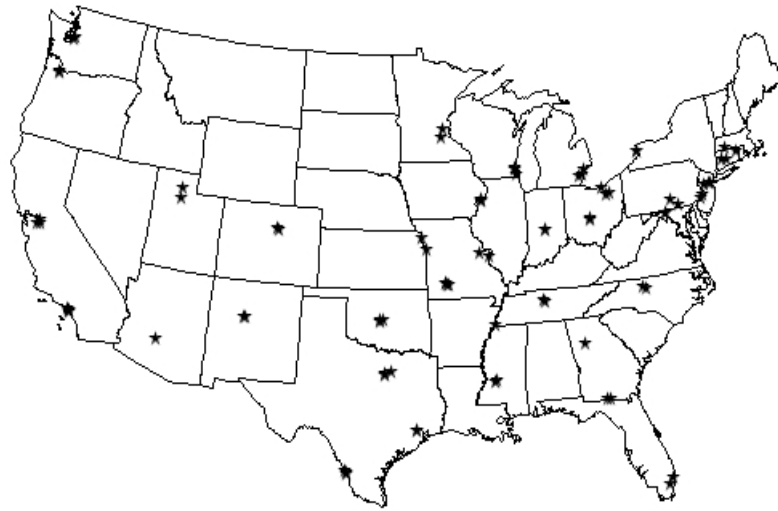

## TriPS Job Descriptions

Table 1: Job Descriptions in the Trucking Industry Cohort

| Job Title                        | Job Description                                                                                                                                                                             |
|----------------------------------|---------------------------------------------------------------------------------------------------------------------------------------------------------------------------------------------|
| <b>Terminal Workers</b>          |                                                                                                                                                                                             |
| Dockworker                       | Works onsite in loading dock and loads/unloads cargo; may operate forklifts                                                                                                                 |
| Mechanic                         | Works onsite in truck repair shop and performs tractor maintenance; job may include fueling                                                                                                 |
| Clerk                            | Works onsite in terminal offices and include cashiers, dispatchers, customer service representatives, and others not regularly near diesel vehicles                                         |
| <b>Drivers</b>                   |                                                                                                                                                                                             |
| Hostler                          | Works onsite driving small specialized tractor units that move trailers around the terminal                                                                                                 |
| Pickup and Delivery (P&D) Driver | Drives tractors or smaller single-bodied trucks within cities and rural areas; picks up and delivers cargo between terminal and consumer; truck cabs are not equipped with air conditioning |
| Long Haul (LH) Driver            | Drives heavy duty tractor-trailer trucks long distances between cities; truck cabs are equipped with air conditioning                                                                       |

### **Choice of EC as Diesel Exhaust Exposure Marker**

There is considerable concern about the health effects of chronic exposure to vehicle exhaust that have been associated with cancer and heart disease. However, the complexity of exhaust components – a mixture of gases, e.g. CO, SO<sub>2</sub> and NO<sub>2</sub>, organic vapors and droplets, and submicron carbon particles with adsorbed toxic components and differences across different vehicle sources and operating conditions – have limited efforts at defining exposures and their contributions to risk. The EC particles with their adsorbed and condensed organic components are one of the main suspects for toxic activity by PM<sub>2.5</sub>.

Exhaust particulate from diesel vehicles in the time periods of interest include an EC core with OC compounds on its surface. Although exhaust particles from spark-ignition vehicles include EC, they include greater amounts of OC (Kleeman et al. 2000). Source apportionment studies that we conducted in trucks and terminals indicate that most of the EC is from diesel sources (Sheesley et al. 2008; Sheesley et al. 2009). Although other non-vehicular combustion sources may contribute to EC and the proportion of EC emitted by diesel engines may vary based on operating conditions, our findings are consistent with previous source apportionment studies in the US (as reviewed in Schauer 2003) and with previous engine emissions and roadway studies (Kleeman et al 2000; Fraser et al. 2003; Riddle et al. 2008). Furthermore, as our EC data were collected in and around trucking terminals and in truck cabs, it is likely that only vehicular sources meaningfully contributed to EC.

## Structure of Baseline Exposure Model

Figure 2 represents a pathway diagram of the SEM used to estimate EC, while Table 1 provides a description of the covariates in the model. In the diagram, the numbers inside the boxes represent the  $R^2$  and equation-specific constants, while the numbers adjacent to the arrows represent the covariate coefficients.

Figure 2: EC SEM Pathway Diagram and Results

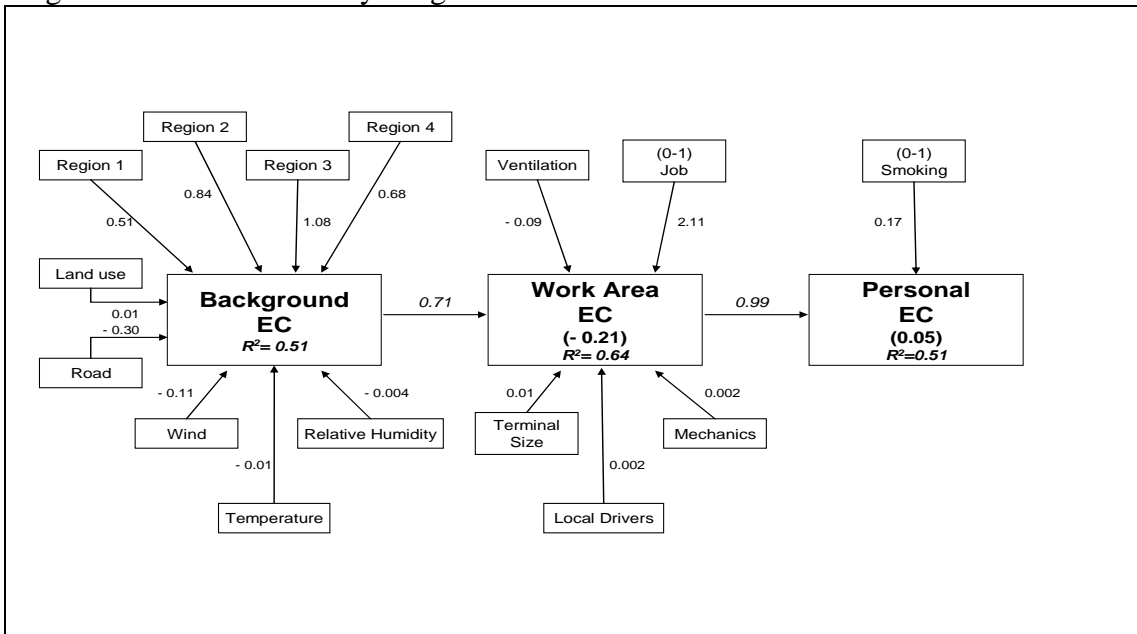

Table 2: Variables in SEM Exposure Model

|                             | Equation 1           | Equation 2                                                                   | Equation 3                                                                                                |
|-----------------------------|----------------------|------------------------------------------------------------------------------|-----------------------------------------------------------------------------------------------------------|
| <b>Endogenous Variables</b> | Personal EC          | Work Area EC                                                                 | Background EC                                                                                             |
| <b>Exogenous Variables</b>  | Smoking              | Job: 0=dockworker, 1=mechanic                                                | Relative Humidity<br>Temperature (C <sup>0</sup> )<br>Wind: Windspeed (km/h)                              |
|                             | <i>Work Area EC</i>  | Terminal Size: acreage<br>Mechanics: # employed<br>Local Drivers: # employed | Road: distance from interstate<br>0 if <500m, 1 if >500m                                                  |
|                             |                      | Ventilation: Temperature*job                                                 | Landuse: % land designated<br>Industrial, Commercial,<br>Transportation within 100m<br>radius of terminal |
|                             | <i>Background EC</i> |                                                                              | Region 1: Midwest (0/1)<br>Region 2: Northeast (0/1)<br>Region 3: South (0/1)<br>Region 4: West (0/1)     |

## Window Status Description

We were able to approximate the window status of sampled trucks using a combination of in-cab CO<sub>2</sub> levels and the temperature differential inside-outside the truck cabs. Based on these data, we established a temperature cutoff of 10<sup>0</sup> Celsius as an indicator of open/shut windows in non-air conditioned truck cabs. The window predictions provided evidence of a significant external source of EC, with higher concentrations when the windows are assumed open (p<0.01) than when they were predicted to be shut. As further evidence of this ‘window effect,’ the relationship only held for drivers in truck cabs without air conditioning (P&D) and not for others where the in-cab temperatures could be regulated with air conditioning (LH).

## Diesel Fuel Timeline

Table 3: History of Diesel Use in the Four TrIPS Companies

| Equipment        | Diesel Use        | Date                   |           |           |           |
|------------------|-------------------|------------------------|-----------|-----------|-----------|
|                  |                   | Company 1 <sup>a</sup> | Company 2 | Company 3 | Company 4 |
| Long-haul trucks | First Used        | 1957                   | 1952      | 1951      | 1955      |
|                  | 100% <sup>b</sup> | 1962                   | 1954      | 1961      | 1965      |
| P&D trucks       | First Used        | 1978                   | 1977      | 1974      | 1972      |
|                  | 100%              | 1987                   | 1992      | 1980      | 1983      |
| Forklifts        | Introduction      | None used              | 1979      | 1986      | 1982      |
|                  | 100%              |                        | 1986      | 1986      | 1984      |
|                  | Phase-out         |                        | 1990      | 1991      | 1992      |
|                  | Last Used         |                        | 1996      | 1994      | 1996      |

<sup>a</sup>To maintain company confidentiality, the companies are referred to as 1 through 4  
<sup>b</sup>Date by which all of the vehicles in the fleet were diesel

## **Selection of EC Background Trend**

To verify that the NJ data represented a reasonable trend in ambient EC conditions over time at the terminals in the cohort, we compared the slope of the median annual COH levels in NJ to a series of vehicle exhaust markers available over a more limited time period. This included the median annual averages of COH from CA (available 1980-2000), as well as the median annual values generated from a spatial mapping of PM<sub>10</sub> and NO<sub>2</sub> (available 1985-2000). For a detailed description of the PM<sub>10</sub> and NO<sub>2</sub> national exposure maps, see Hart et al. (2009).

Figure 2 provides a graphical comparison of these data during the period for which all are available. The downward trend in COH (both NJ and CA) is much steeper over time than it is for PM<sub>10</sub> or NO<sub>2</sub>. Since COH is more closely related to EC than either PM<sub>10</sub> or NO<sub>2</sub>, and these datasets also provided the most limited time series, they were ruled out as potential background EC modifiers for the purposes of this study. We then compared the COH trends in NJ and CA with the background EC data available from the late 1980s assessment of the industry, and the NJ data were much more strongly aligned with these earlier data than CA. For example, the Zaebst et al. (1991) assessment reported background EC geometric means that were approximately 2.2 times higher than those observed during the more recent TriPS assessment (Smith et al. 2006), which corresponded to the temporal pattern of COH in NJ (2.2 times higher between base year 2000 with the 1988-89 period). Based on the fact that the NJ COH trend provided such a strong fit, with the additional benefit that it was available over the longest time period, we used the NJ COH data to adjust for background trends in this study.

Figure 3: Comparison of Background Trends 1985-2000

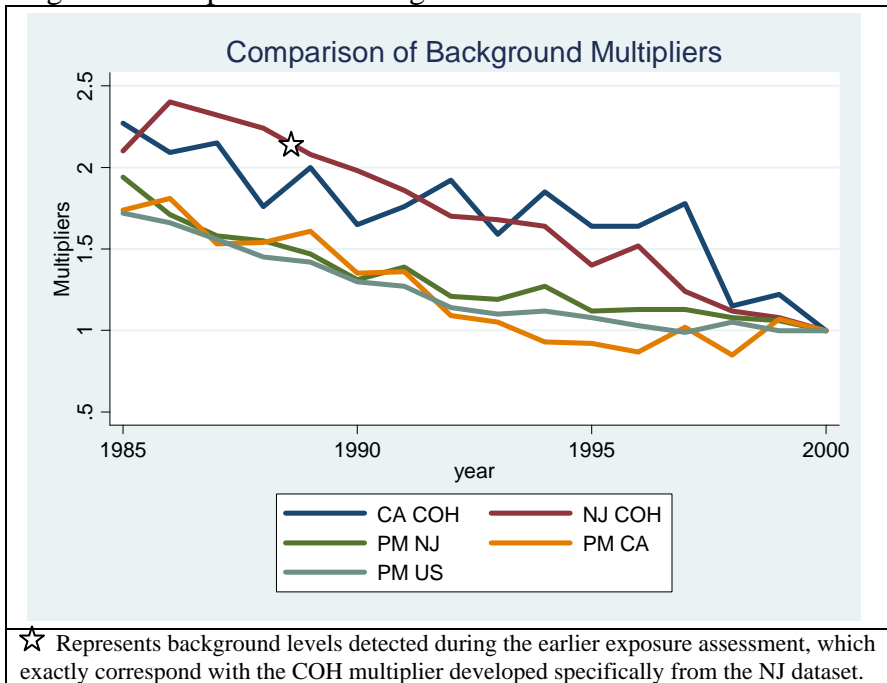

## References

Fraser MP, Buzcu B, Yue ZQ, McGaughey GR, Desai NR, Allen DT, Seila RL, Lonneman WA, Harley RA. 2003. Separation of fine particulate matter emitted from gasoline and diesel vehicles using chemical mass balancing techniques. *Environ Sci Technol* 37:3904-9.

Hart JE, Yanosky JD, Puett RC, Ryan L, Dockery DW, Smith TJ, Garshick E, Laden F. 2009. Spatial modeling of PM10 and NO2 in the continental United States, 1985-2000. *Env Health Perspect* 117:1690-1696.

Kleeman MJ, Schauer JJ, Cass GR. 2000. Size and composition distribution of fine particulate matter emitted from motor vehicles. *Environ Sci Technol* 34:1132-1142.

Riddle SG, Robert MA, Jakober CA, Hannigan MP, Kleeman MJ. 2008. Size-resolved source apportionment of airborne particle mass in a roadside environment. *Environ. Sci. Technol* 42:6580–6586.

Schauer JJ. 2003. Evaluation of elemental carbon as a marker for diesel particulate matter. *J Exp Sci Environ Epidemiol* 13:443–453.

Sheesley RJ, Schauer JJ, Garshick E, Laden F, Smith TJ, Blizcharz AP, DeMinter JT. 2009. Tracking personal exposure to particulate diesel exhaust in a diesel freight terminal using organic tracer analysis. *J Exp Sci Environ Epidemiol* 19:172-86.

Sheesley RJ, Schauer JJ, Smith TJ Garshick E, Laden F, Marr L, Molina L. 2008. Assessment of diesel particulate matter in the workplace: freight terminals. *J Environ Monitor* 10:305-14.

Smith TJ, Davis ME, Reaser P, Hart JE, Laden F, Heff A, Garshick E. 2006. Overview of particulate exposures in the US trucking industry. *J Environ Monit* 8:711-720.

Zaebst DD, Clapp DE, Blade LM, Marlow DA, Steenland K, Hornung RW, Scheutzle D, Butler J. 1991. Quantitative determination of trucking industry workers' exposures to diesel exhaust particles. *Am Ind Hyg Assoc J* 52:529–541.
